# Supplementary material
Source: PubMed Central journal article supplement (PMC3805787)

# Figure S1

A

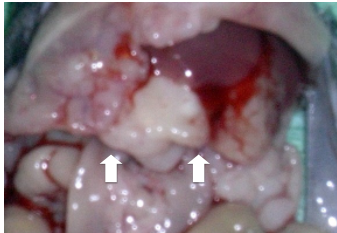

B

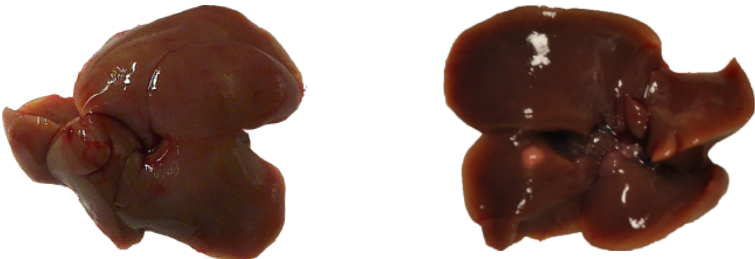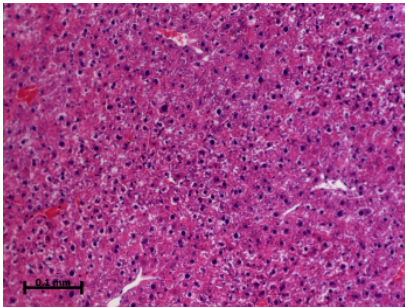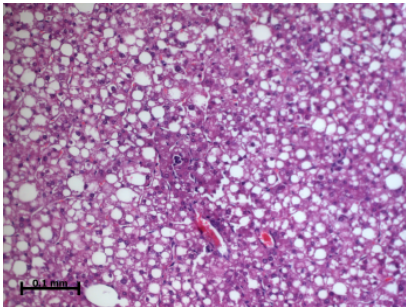

C

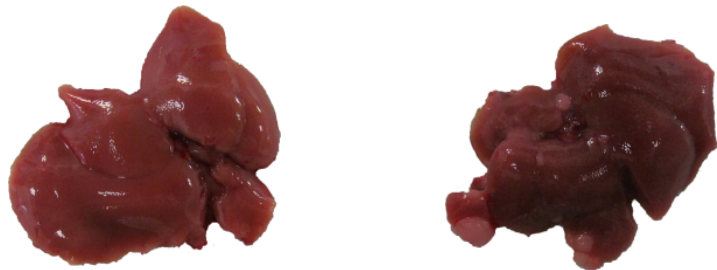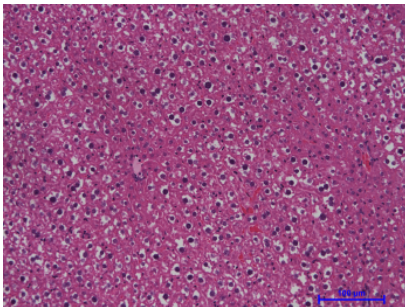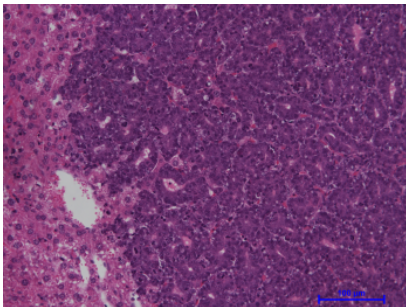

**Figure S2**

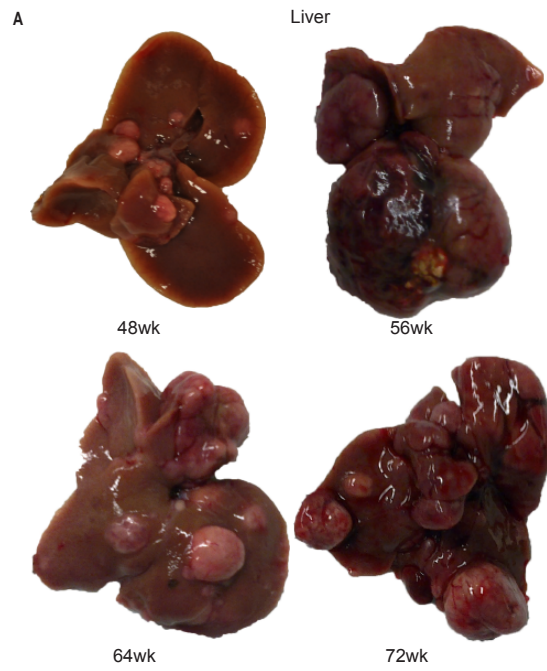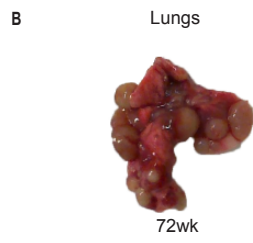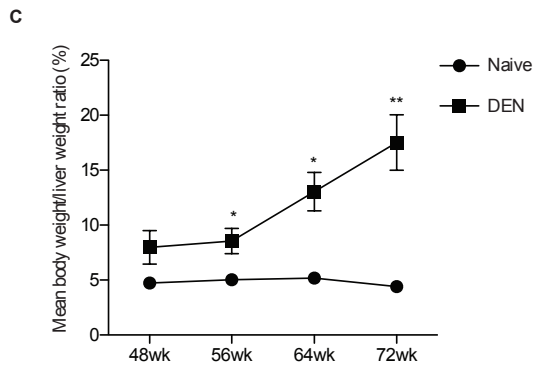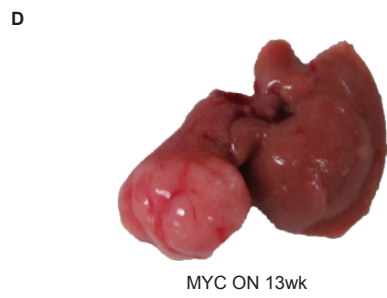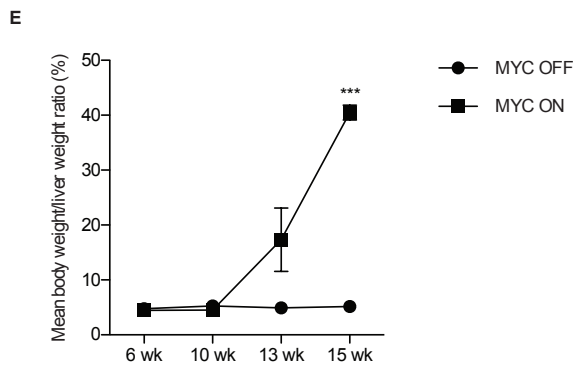

**Figure S3**

**A**

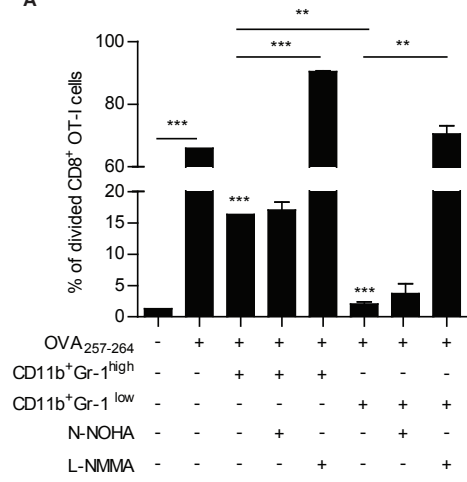

**Figure S4**

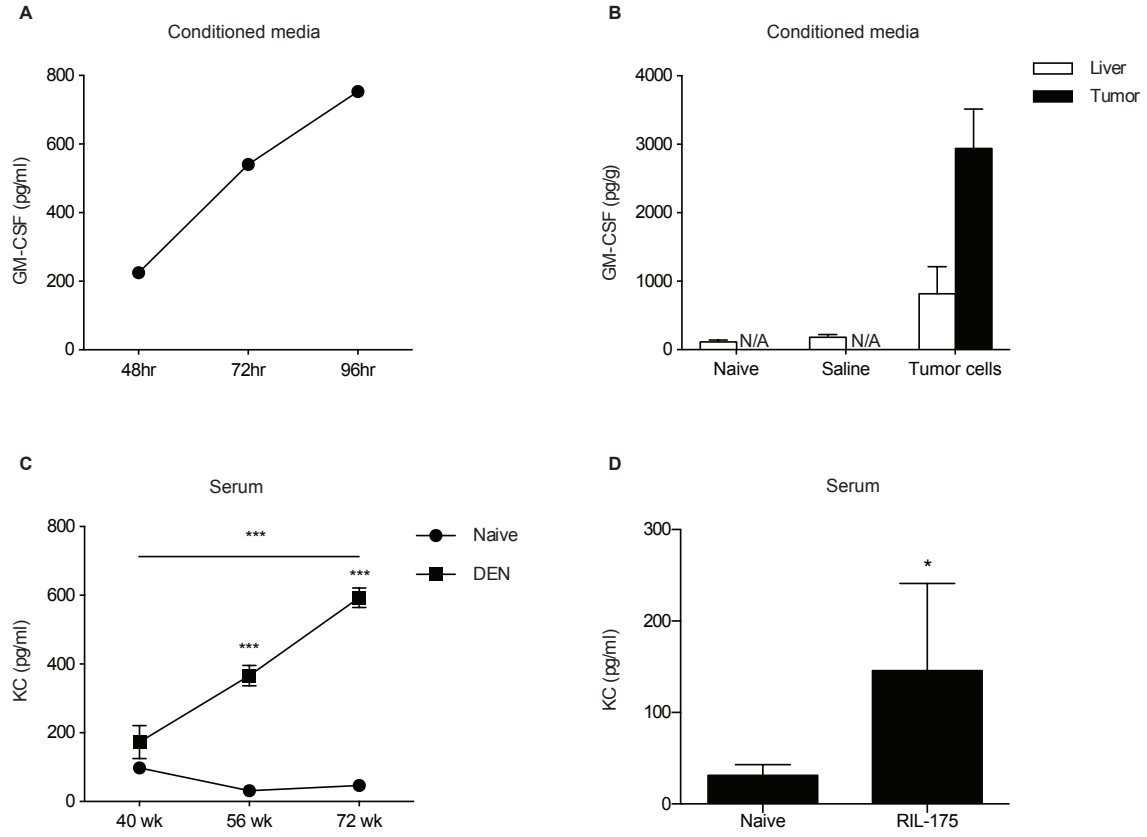

### Supplementary Figure S5

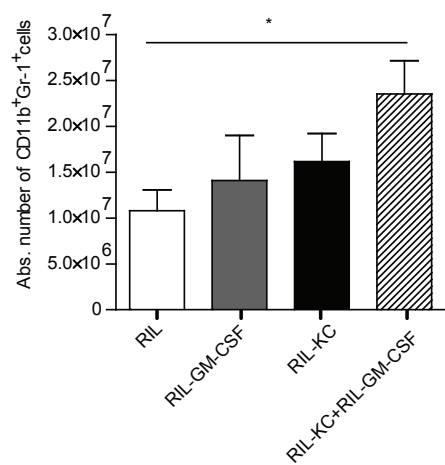

Supplement: NIHMS501263-supplement-01.pdf [file NIHMS501263-supplement-01.pdf]
